# Supplementary material
Source: publisher figshare collection journal article supplement (https://frontiersin.figshare.com/ndownloader/files/14454677)
Supplement: Supplementary file [file 14454677]

## *Supplementary Material*

### **A Saccharide Chemosensor Array Developed Based on an Indicator Displacement Assay Using a Combination of Commercially Available Reagents**

Yui Sasaki, Zhoujie Zhang and Tsuyoshi Minami\*

---

Institute of Industrial Science, The University of Tokyo, 4-6-1 Komaba, Meguro-ku, Tokyo, Japan

**\* Correspondence:**

Tsuyoshi Minami

tminami@iis.u-tokyo.ac.jp

### **Contents**

|                                               |            |
|-----------------------------------------------|------------|
| <b>1. UV-vis measurements for saccharides</b> | <b>S2</b>  |
| <b>2. FAB MS Analysis</b>                     | <b>S6</b>  |
| <b>3. Analysis of Variance</b>                | <b>S8</b>  |
| <b>4. Linear Discriminant Analysis (LDA)</b>  | <b>S9</b>  |
| <b>5. Results of Quantitative Analysis</b>    | <b>S13</b> |

# 1 UV-vis measurements for saccharides

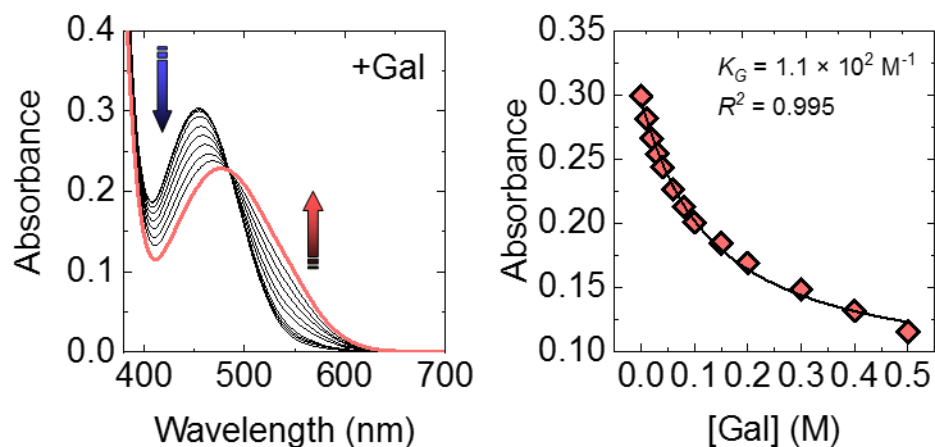

**Supplementary Figure 1.** UV – vis spectra of the ARS (40  $\mu\text{M}$ )–3-NPBA (6 mM) complex upon the addition of galactose in a phosphate buffer solution (100 mM) at a pH of 7.4 at 25  $^{\circ}\text{C}$ .

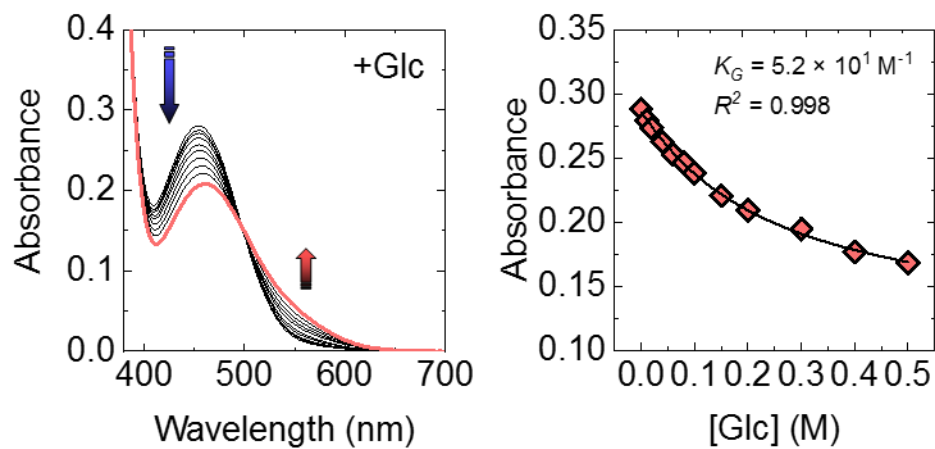

**Supplementary Figure 2.** UV – vis spectra of the ARS (40  $\mu\text{M}$ )–3-NPBA (6 mM) complex upon the addition of glucose in a phosphate buffer solution (100 mM) at a pH of 7.4 at 25  $^{\circ}\text{C}$ .

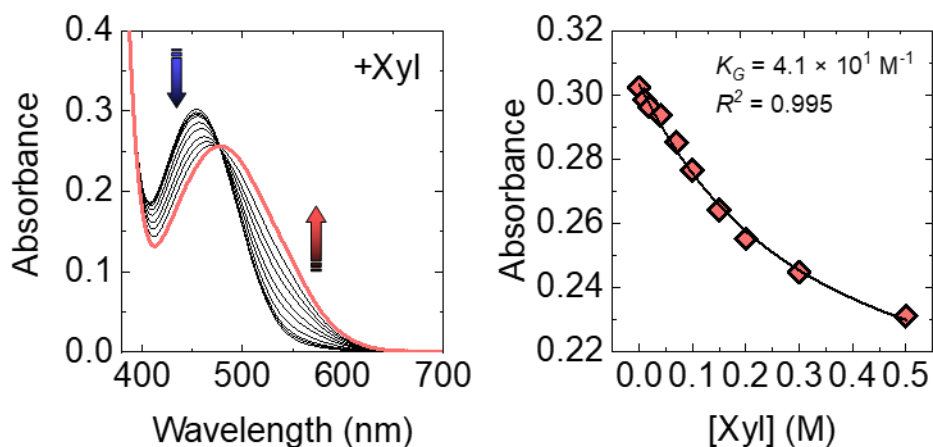

**Supplementary Figure 3.** UV – vis spectra of the ARS (40 μM)–3-NPBA (6 mM) complex upon the addition of xylose in a phosphate buffer solution (100 mM) at a pH of 7.4 at 25 °C.

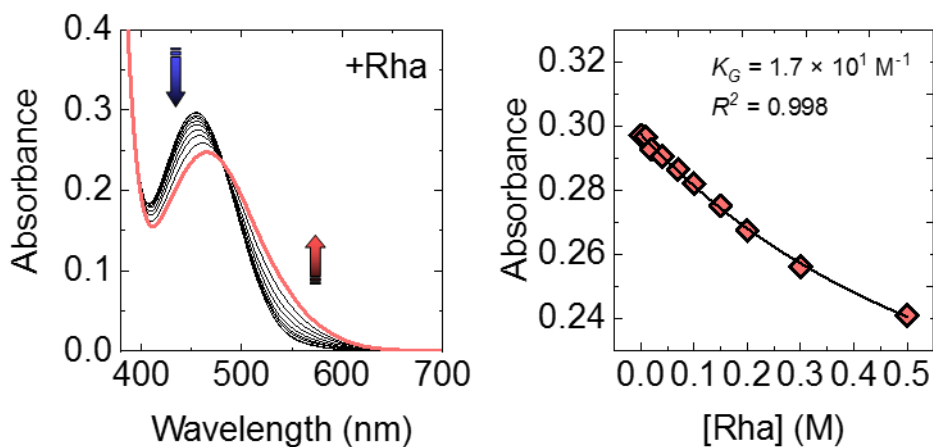

**Supplementary Figure 4.** UV – vis spectra of the ARS (40 μM)–3-NPBA (6 mM) complex upon the addition of rhamnose in a phosphate buffer solution (100 mM) at a pH of 7.4 at 25 °C.

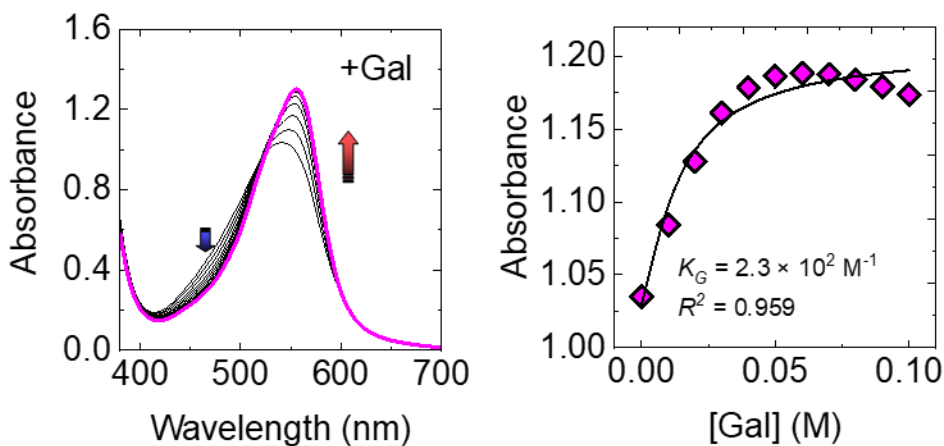

**Supplementary Figure 5.** UV – vis spectra of the BPR (40 μM)–3-NPBA (6 mM) complex upon the addition of galactose in a phosphate buffer solution (100 mM) at a pH of 7.4 at 25 °C.

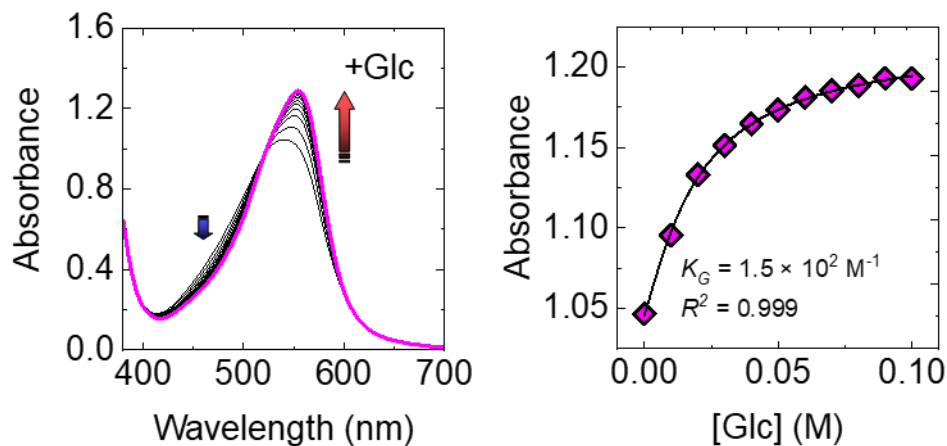

**Supplementary Figure 6.** UV – vis spectra of the BPR (40  $\mu$ M)–3-NPBA (6 mM) complex upon the addition of glucose in a phosphate buffer solution (100 mM) at a pH of 7.4 at 25  $^{\circ}$ C.

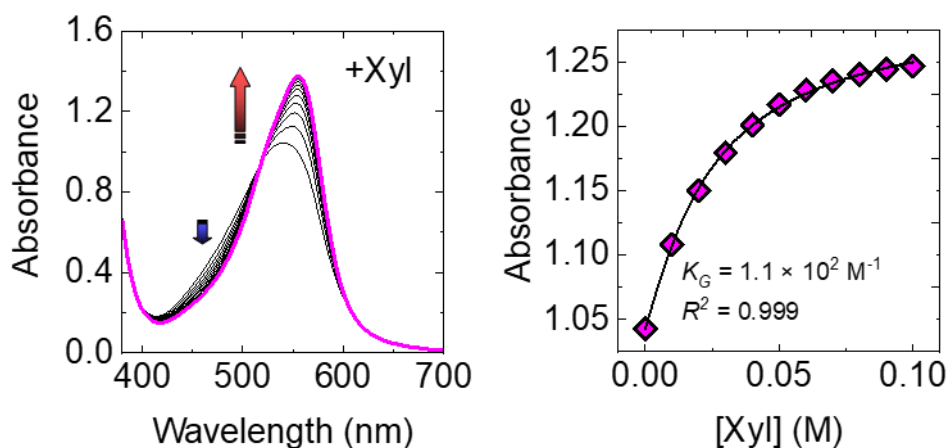

**Supplementary Figure 7.** UV – vis spectra of the BPR (40  $\mu$ M)–3-NPBA (6 mM) complex upon the addition of xylose in a phosphate buffer solution (100 mM) at a pH of 7.4 at 25  $^{\circ}$ C.

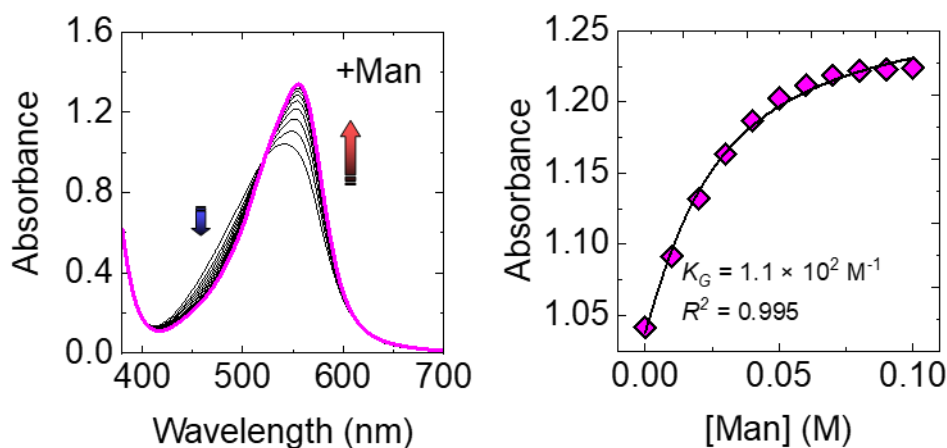

**Supplementary Figure 8.** UV – vis spectra of the BPR (40  $\mu$ M)–3-NPBA (6 mM) complex upon the addition of mannose in a phosphate buffer solution (100 mM) at a pH of 7.4 at 25  $^{\circ}$ C.

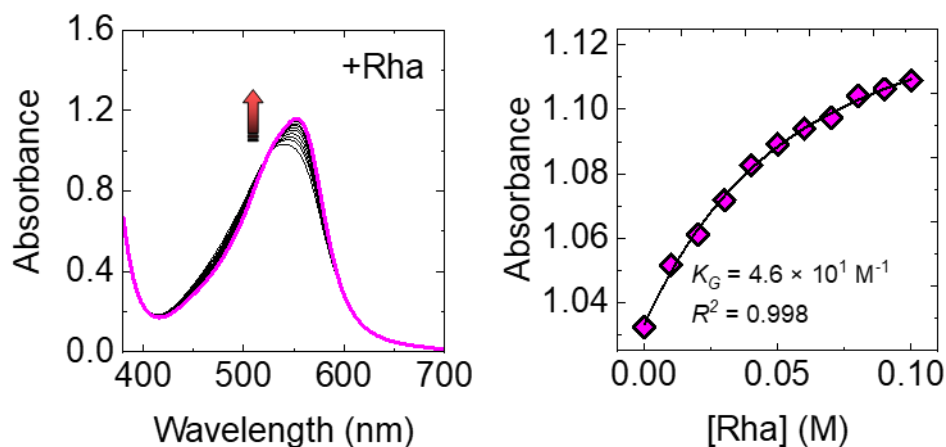

**Supplementary Figure 9.** UV – vis spectra of the BPR (40  $\mu\text{M}$ )–3-NPBA (6 mM) complex upon the addition of rhamnose in a phosphate buffer solution (100 mM) at a pH of 7.4 at 25  $^{\circ}\text{C}$ .

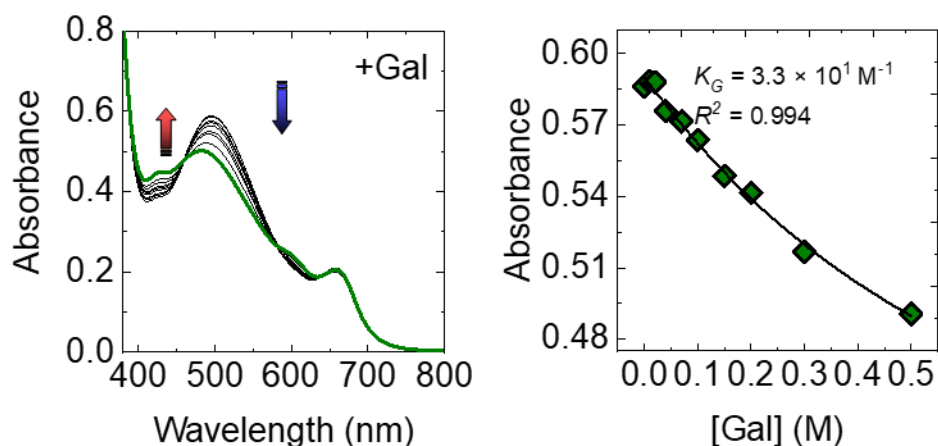

**Supplementary Figure 10.** UV – vis spectra of the PV (40  $\mu\text{M}$ )–3-NPBA (6 mM) complex upon the addition of galactose in a phosphate buffer solution (100 mM) at a pH of 7.4 at 25  $^{\circ}\text{C}$ .

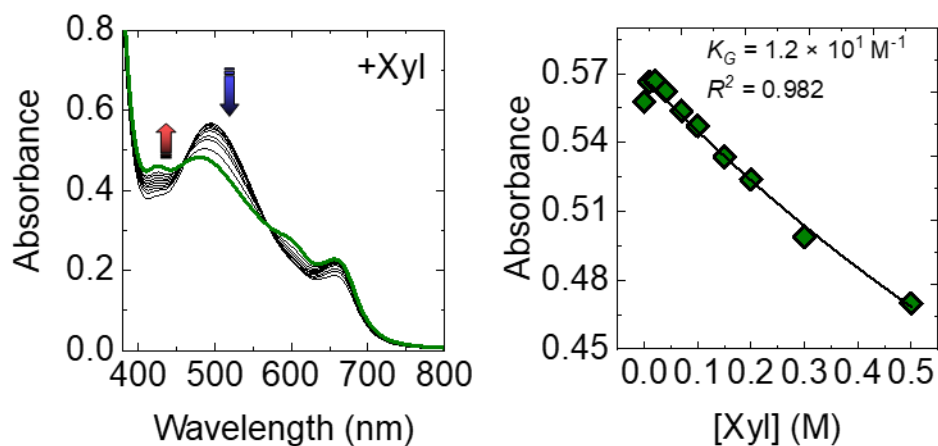

**Supplementary Figure 12.** UV – vis spectra of the PV (40  $\mu\text{M}$ )–3-NPBA (6 mM) complex upon the addition of xylose in a phosphate buffer solution (100 mM) at a pH of 7.4 at 25  $^{\circ}\text{C}$ .

## 2 FAB MS Analysis

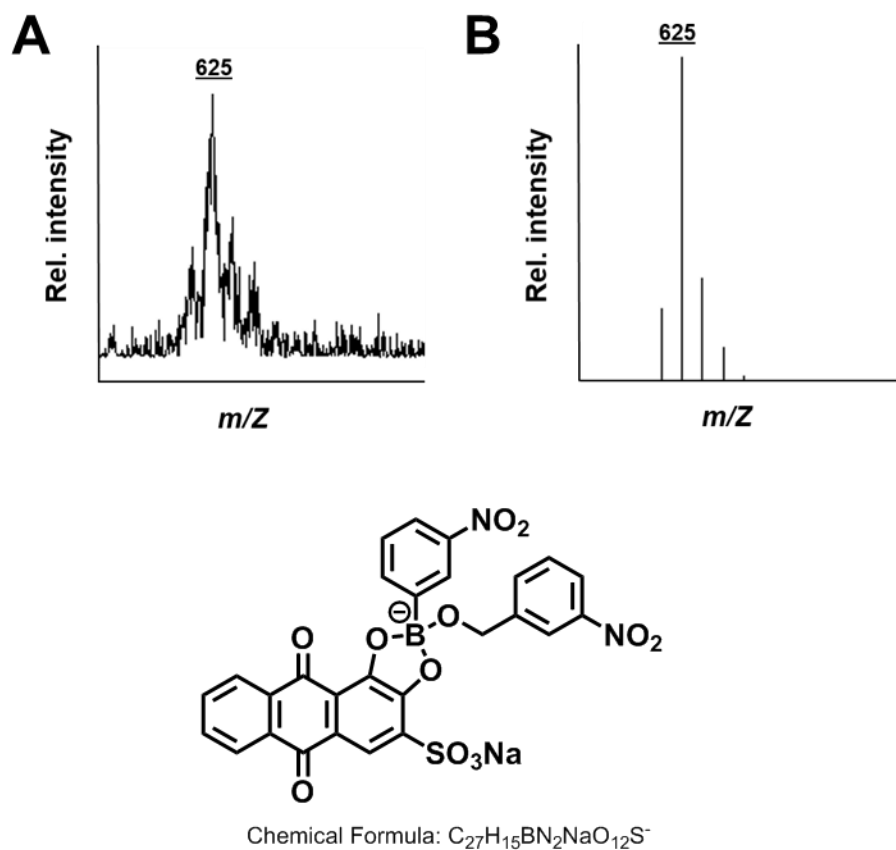

**Supplementary Figure 13.** (A) FAB MS (negative) spectra of the ARS-3-NBPA complex. (B) Calculated isotope pattern for  $[ARS-2H_2O+3-NPBA+3-NBA-H]^-$ . Matrix: 3-nitrobenzylalcohol.

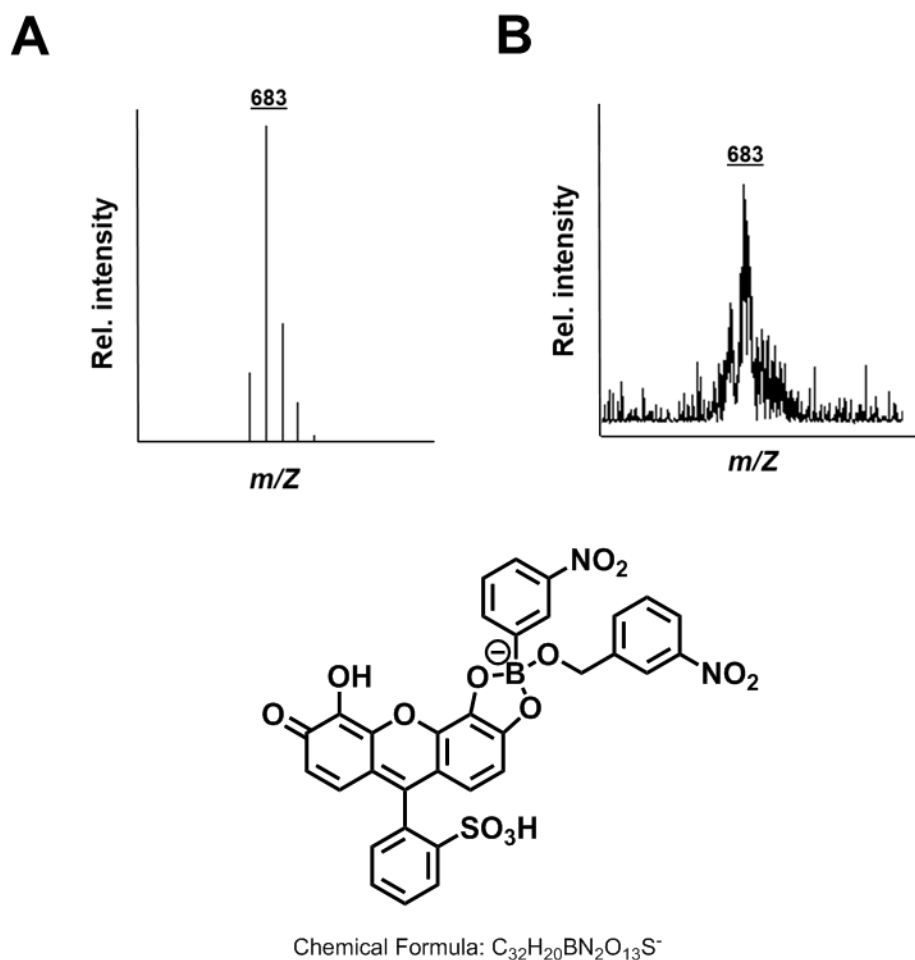

**Supplementary Figure 14.** (A) FAB MS (negative) spectra of the PR-3-NBPA complex. (B) Calculated isotope pattern for  $[PR-2H_2O+3-NPBA+3-NBA-H]^-$ . Matrix: 3-nitrobenzylalcohol.

### 3 Analysis-of-Variance (ANOVA)

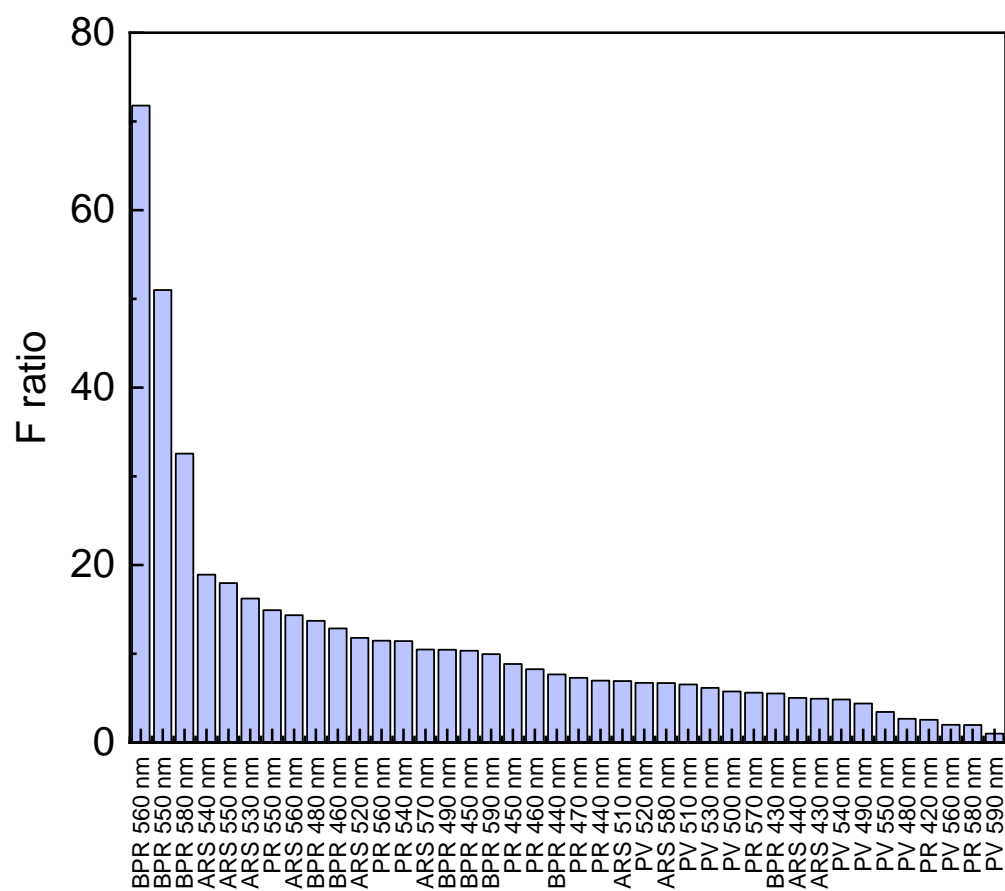

**Supplementary Figure 15.** One-way ANOVA result of the qualitative analysis.



#### 4 Linear Discriminant Analysis (LDA)

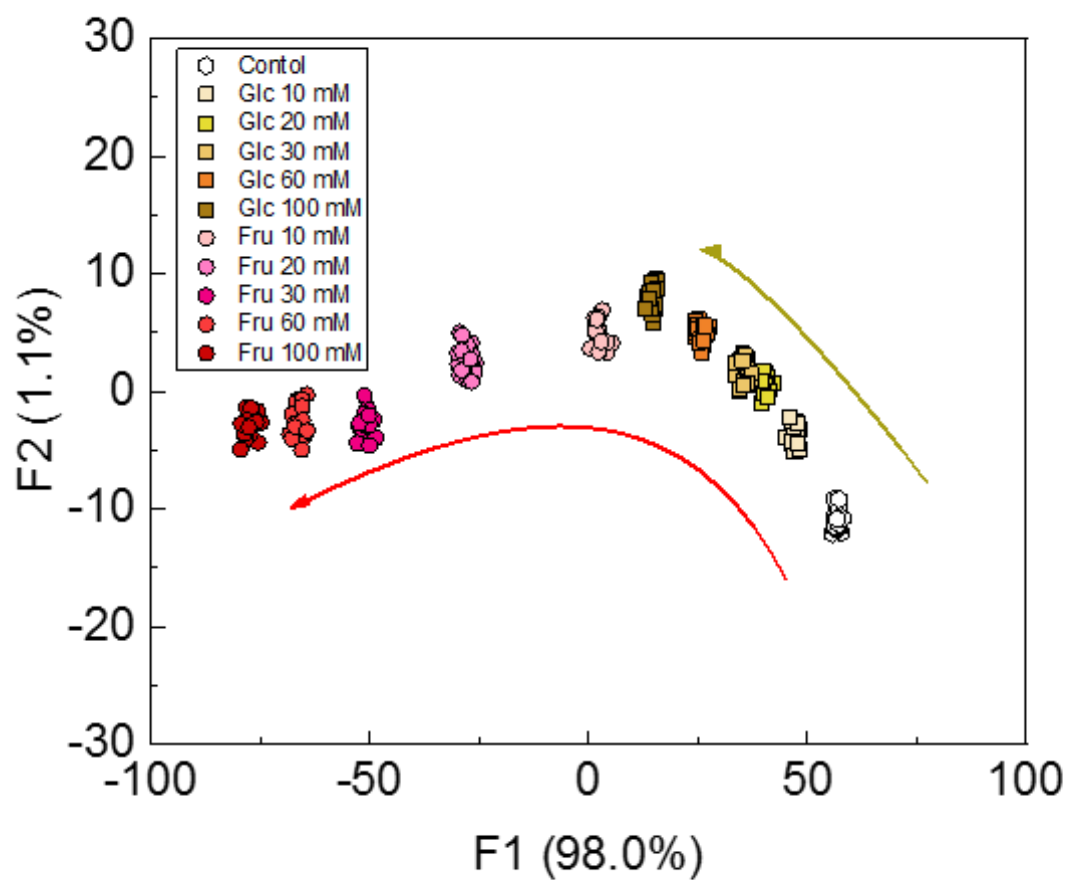

**Supplementary Figure 16.** LDA plots for the semi-quantitative assay for Fru (○) and Glc (□) at the concentration range of 0–100 mM. Twenty repetitions were measured for each concentration.

**Supplementary Table 1** Jackknifed classification matrix of the qualitative assay for Fru and Glc

[illegible]

### Canonical Scores Plot

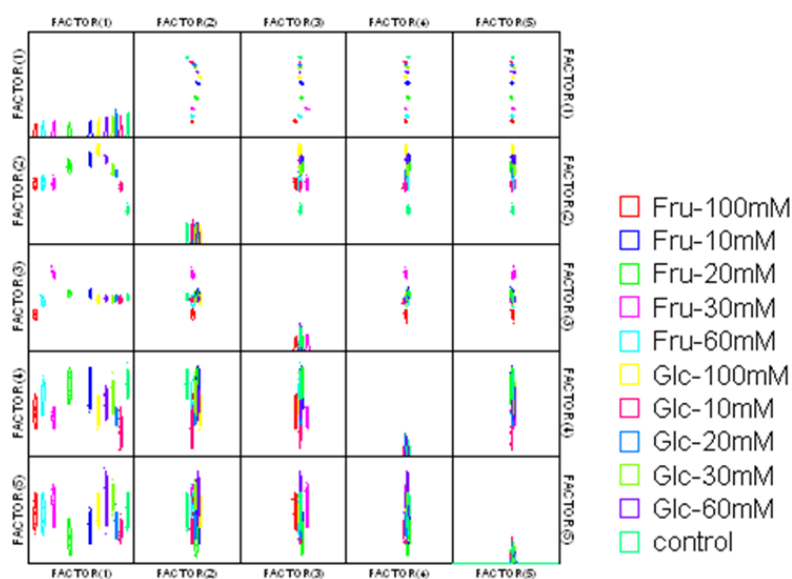

**Supplementary Figure 17.** Canonical score plot of the qualitative assay for Fru and Glc.

**Supplementary Table 2** Jackknifed classification matrix of the qualitative assay for Fru

| Jackknifed Classification Matrix |           |          |          |          |          |         |          |
|----------------------------------|-----------|----------|----------|----------|----------|---------|----------|
|                                  | Fru-100mM | Fru-10mM | Fru-20mM | Fru-30mM | Fru-60mM | control | %correct |
| Fru-100mM                        | 20        | 0        | 0        | 0        | 0        | 0       | 100      |
| Fru-10mM                         | 0         | 20       | 0        | 0        | 0        | 0       | 100      |
| Fru-20mM                         | 0         | 0        | 20       | 0        | 0        | 0       | 100      |
| Fru-30mM                         | 0         | 0        | 0        | 20       | 0        | 0       | 100      |
| Fru-60mM                         | 0         | 0        | 0        | 0        | 20       | 0       | 100      |
| control                          | 0         | 0        | 0        | 0        | 0        | 20      | 100      |
| Total                            | 20        | 20       | 20       | 20       | 20       | 20      | 100      |

**Canonical Scores Plot**

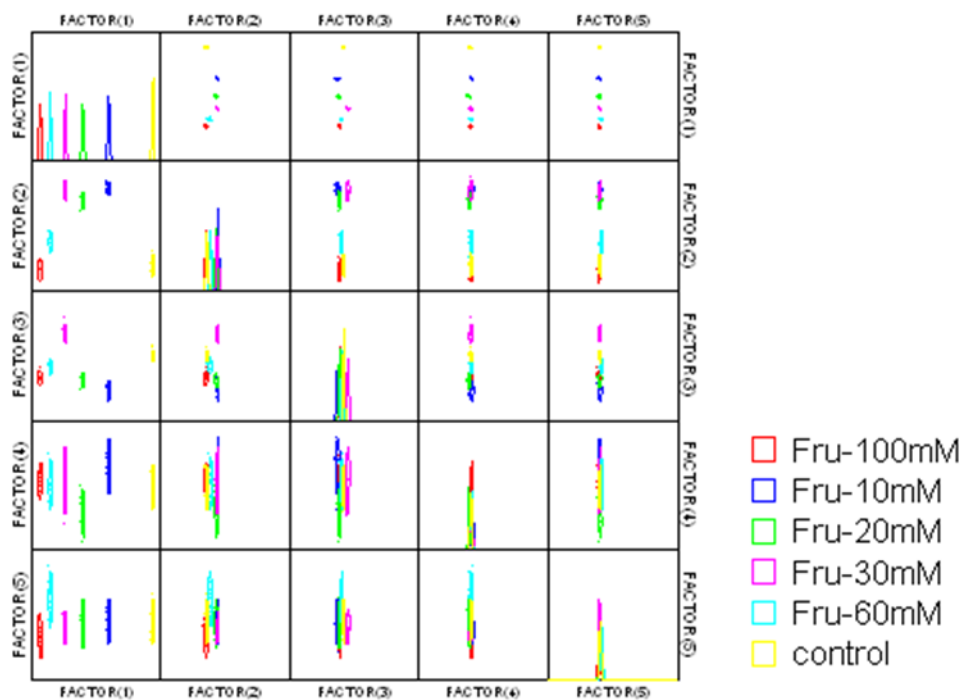

**Supplementary Figure 18.** Canonical score plot of the qualitative assay for Fru.

**Supplementary Table 3** Jackknifed classification matrix of the qualitative assay for Glc

| <b>Jackknifed Classification Matrix</b> |           |          |          |          |          |         |          |
|-----------------------------------------|-----------|----------|----------|----------|----------|---------|----------|
|                                         | Glc-100mM | Glc-10mM | Glc-20mM | Glc-30mM | Glc-60mM | control | %correct |
| Glc-100mM                               | 20        | 0        | 0        | 0        | 0        | 0       | 100      |
| Glc-10mM                                | 0         | 20       | 0        | 0        | 0        | 0       | 100      |
| Glc-20mM                                | 0         | 0        | 20       | 0        | 0        | 0       | 100      |
| Glc-30mM                                | 0         | 0        | 0        | 20       | 0        | 0       | 100      |
| Glc-60mM                                | 0         | 0        | 0        | 0        | 20       | 0       | 100      |
| control                                 | 0         | 0        | 0        | 0        | 0        | 20      | 100      |
| Total                                   | 20        | 20       | 20       | 20       | 20       | 20      | 100      |

**Canonical Scores Plot**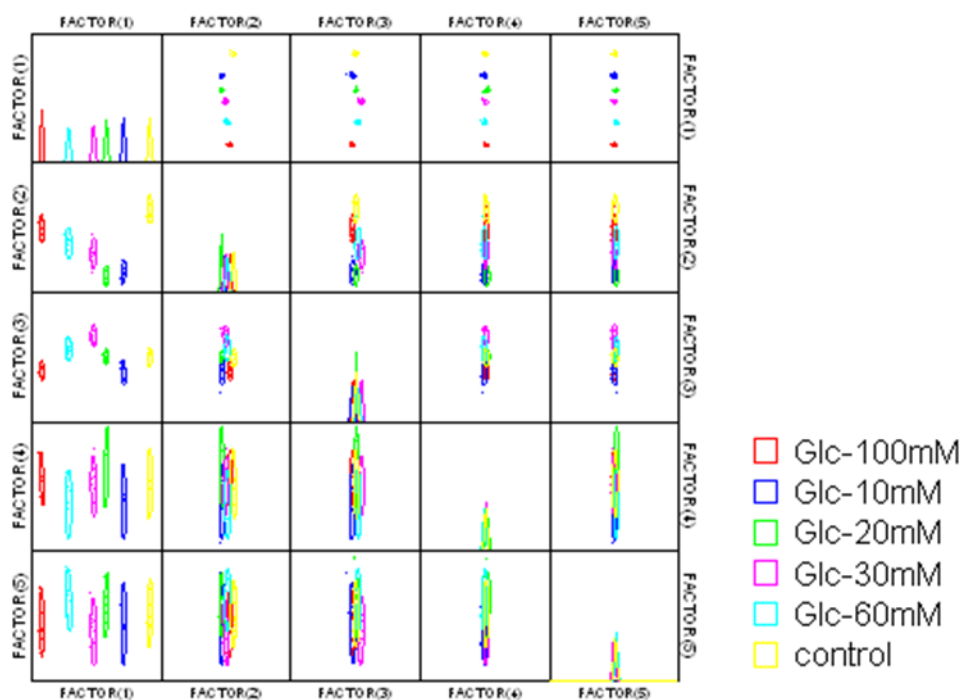**Supplementary Figure 19.** Canonical score plot of the qualitative assay for Glc.

## 5 Results of Quantitative Analysis

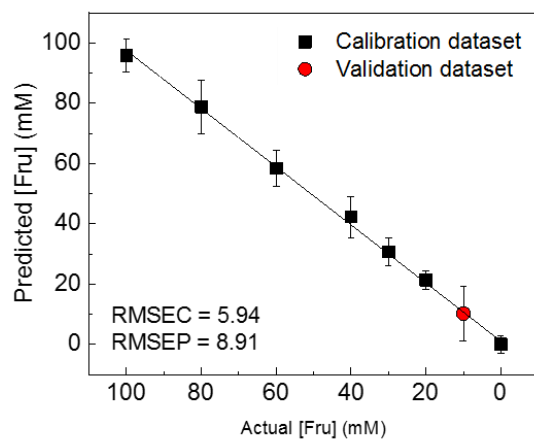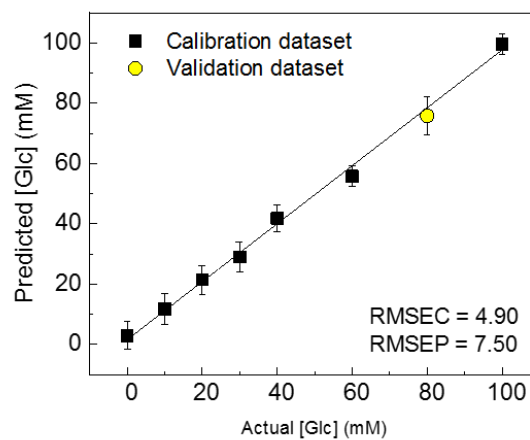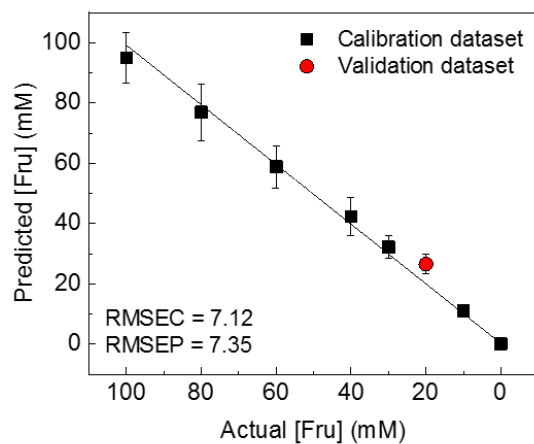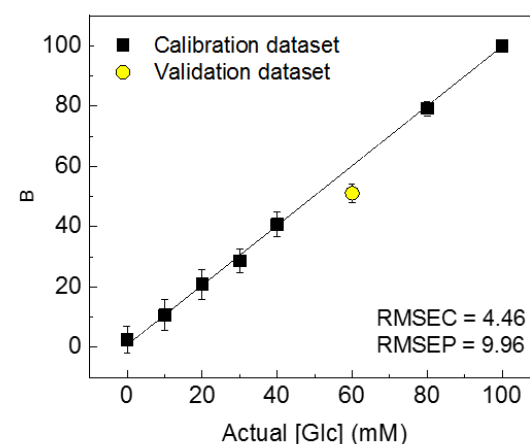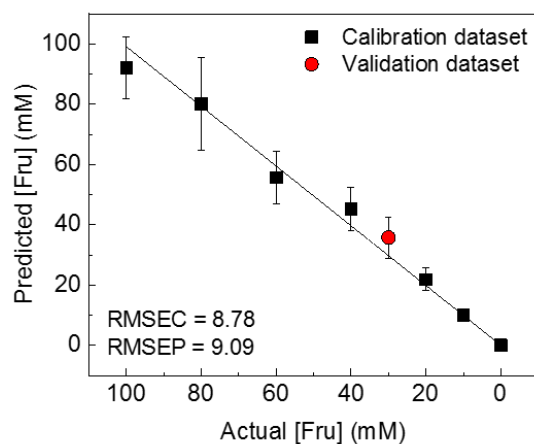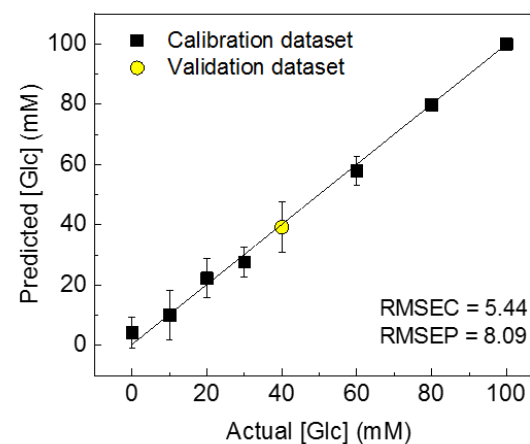

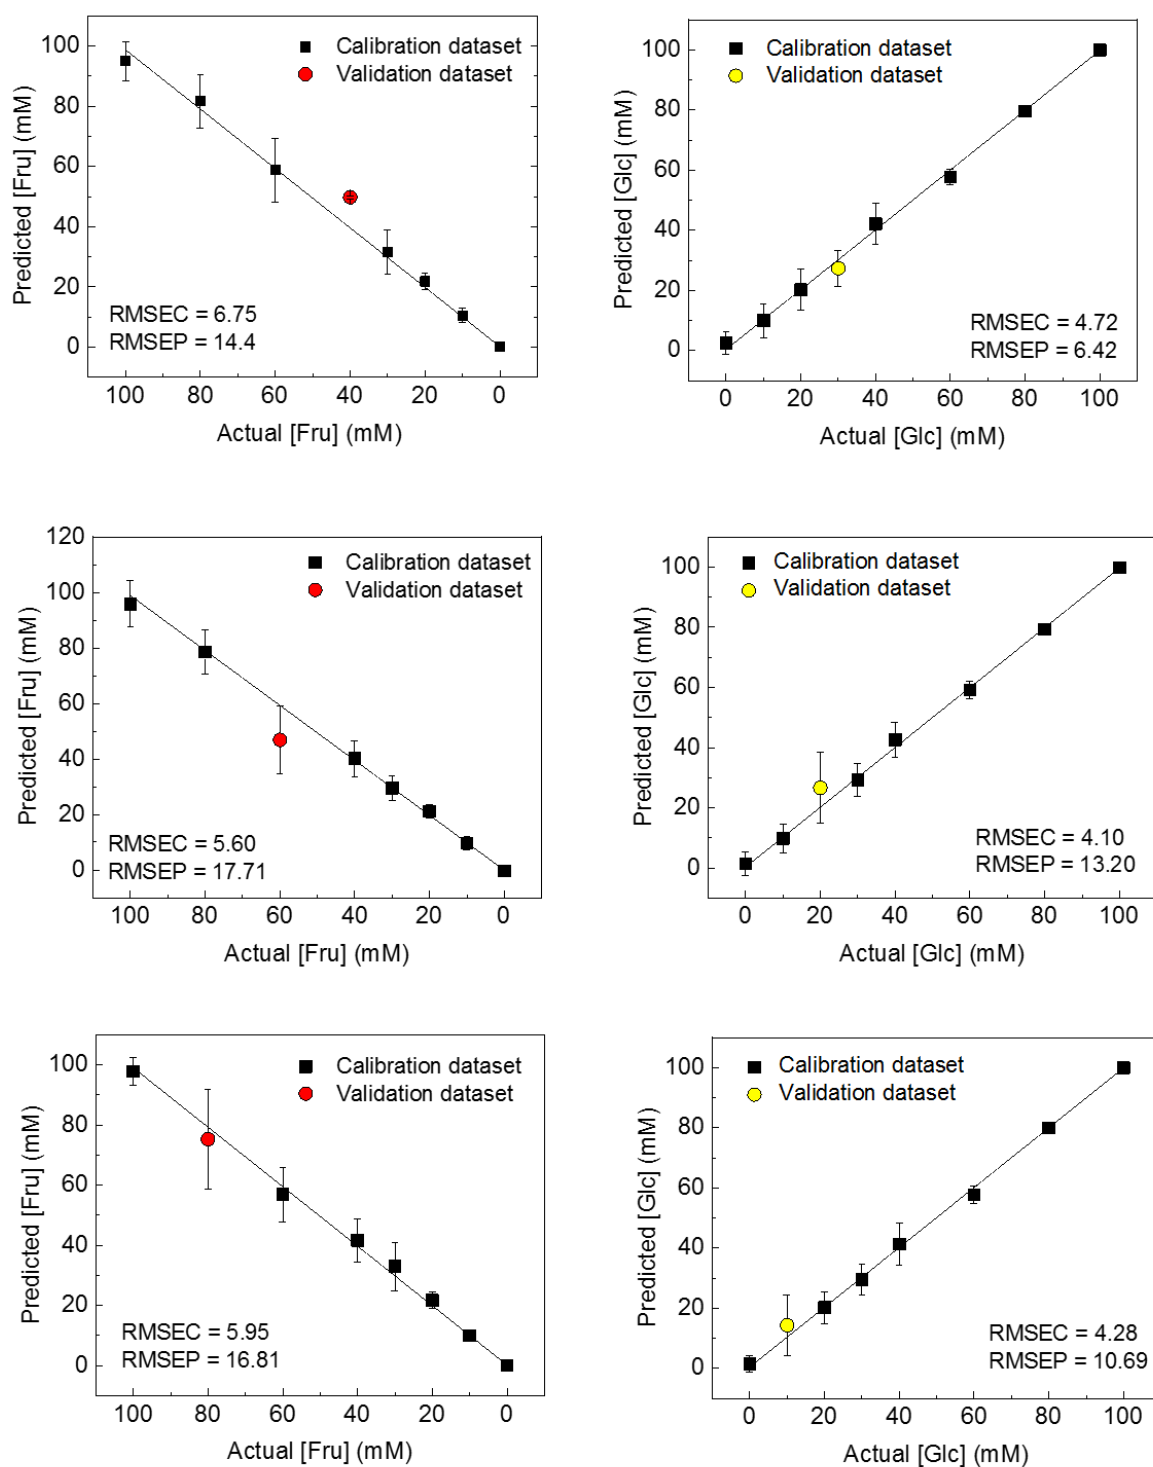

**Supplementary Figure 20** SVM regression results used for quantitative analyses of Fru and Glc mixtures. The values of the root-mean-square errors of calibration (RMSEC) and prediction (RMSEP) (shown as insets) attest to the high accuracies of the model and its predictive capacity.
